# Supplementary material for: Type III CRISPR-Cas effectors act as protein-assisted ribozymes during RNA cleavage
Source: Research Square preprint supplement (doi:10.21203/rs.3.rs-2837968/v1), 2023-04-27
Supplement: Supplementary file 1 [file e8adc78e49c1e7932fe9b28b.pdf]

## **Extended Data**

### **Type III CRISPR-Cas complexes act as protein-assisted ribozymes during target RNA cleavage**

Evan A. Schwartz, Jack P.K. Bravo, Mohd Ahsan, Luis A. Macias, Caitlyn L. McCafferty, Tyler L. Dangerfield, Jada N. Walker, Jennifer S. Brodbelt, Giulia Palermo, Peter C. Fineran, Robert D. Fagerlund, and David W. Taylor

**Extended Data Table 1** | Theoretical masses, experimental masses, and % deviation of the type III-Dv complex, subcomplexes, and individual subunits. Experimental masses were recorded via native and LC-mass spectrometry.

| Type III-Dv Complex                                               | Theoretical mass (Da) | Native MS Experimental mass (Da) | Denaturing LC-MS Experimental mass (Da) | Deviation from expected mass (%) <sup>*</sup> |
|-------------------------------------------------------------------|-----------------------|----------------------------------|-----------------------------------------|-----------------------------------------------|
| Cas7_insert•Cas7-Cas5-Cas11•Cas10-His6•Cas7-2x•Csx19•mature crRNA | 331,405               | 332,300                          | -                                       | 0.27                                          |
| Cas7_insert•Cas7-Cas5-Cas11•Cas10-His6•Cas7-2x•mature crRNA       | 310,213               | 310,980                          | -                                       | 0.25                                          |
| Cas7_insert•Cas7-Cas5-Cas11•Cas10-His6•Csx19•mature crRNA         | 274,778               | 274,840                          | -                                       | 0.02                                          |
| Cas7_insert•Cas7-Cas5-Cas11•Cas7-2x•Csx19•mature crRNA            | 267,286               | 267,770                          | -                                       | 0.18                                          |
| Cas10-His6•mature crRNA                                           | 76,055                | -                                | 76,110                                  | 0.07                                          |
| Cas7_insert                                                       | 90,080                | -                                | 90,080                                  | 0.00                                          |
| Cas7-Cas5-Cas11                                                   | 87,451                | -                                | 87,450                                  | 0.00                                          |
| Cas10-His6                                                        | 64,119                | 64,170                           | 64,120                                  | 0.00                                          |
| Cas7-2x                                                           | 56,627                | -                                | 56,630                                  | 0.01                                          |
| Csx19                                                             | 21,192                | 21,190                           | 21,190                                  | 0.01                                          |
| Mature crRNA                                                      | 11,936                | -                                | -                                       | -                                             |

**Extended Data Table 2** | Model Statistics for the type III-Dv binary complex, non-self target-bound complex, and self target pre-cleavage and post-cleavage complexes.

|                                                                        | Binary Complex                          | Non-Self<br>Target-Bound<br>Complex    | Self Target Pre-<br>Cleavage<br>Complex | Self Target Post-<br>cleavage<br>complex |
|------------------------------------------------------------------------|-----------------------------------------|----------------------------------------|-----------------------------------------|------------------------------------------|
| <b>Data collection and processing</b>                                  | cryoSPARC v2                            | cryoSPARC v2                           | cryoSPARC v3                            | cryoSPARC v3                             |
| Magnification                                                          | 105,000x                                | 105,000x                               | 105,000x                                | 105,000x                                 |
| Voltage (kV)                                                           | 300                                     | 300                                    | 300                                     | 300                                      |
| Electron exposure (e <sup>-</sup> /Å <sup>2</sup> )                    | 80.5                                    | 80.5                                   | 80                                      | 80                                       |
| Defocus range (µm)                                                     | 1.2-2.2                                 | 1.2-2.2                                | 1.2-2.2                                 | 1.2-2.2                                  |
| Pixel size (Å)                                                         | 0.81                                    | 0.81                                   | 0.8332                                  | 0.8332                                   |
| Symmetry imposed                                                       | C1                                      | C1                                     | C1                                      | C1                                       |
| Initial particle images (no.)                                          | 1,890,840                               | 1,919,796                              | 1,280,364                               | 1,280,364                                |
| Final particle images (no.)                                            | 648,782                                 | 609,722                                | 181,656                                 | 41,202                                   |
| Map resolution (Å)<br>FSC threshold                                    | 2.5<br>0.143                            | 2.8<br>0.143                           | 3.0<br>0.143                            | 3.4<br>0.143                             |
| Map resolution range (Å)                                               | N/A                                     | N/A                                    | N/A                                     | N/A                                      |
| <b>Refinement</b>                                                      |                                         |                                        |                                         |                                          |
| Model resolution (Å)<br>FSC threshold                                  | 2.6<br>0.5                              | 2.8<br>0.5                             | 3.1<br>0.5                              | 3.7<br>0.5                               |
| Model resolution range (Å)                                             | N/A                                     | N/A                                    | N/A                                     | N/A                                      |
| Map sharpening <i>B</i> factor (Å <sup>2</sup> )                       | 99.3                                    | 124.7                                  | 114.1                                   | 97.5                                     |
| Model composition<br>Non-hydrogen atoms<br>Protein residues<br>Ligands | 21968<br>2692<br>0                      | 22598<br>2685<br>0                     | 22589<br>2685<br>0                      | 22405<br>2697<br>0                       |
| <i>B</i> factors (Å <sup>2</sup> )<br>Protein<br>Nucleotide            | 14.56/101.45/47.39<br>15.79/67.58/30.46 | 15.07/97.79/50.92<br>16.14/80.16/36.66 | 13.69/81.92/40.10<br>12.49/79.61/28.83  | 46.76/162.27/88.37<br>54.04/126.03/72.68 |
| R.m.s. deviations<br>Bond lengths (Å)<br>Bond angles (°)               | 0.008<br>0.894                          | 0.007<br>0.866                         | 0.005<br>0.786                          | 0.006<br>0.801                           |
| <b>Validation</b>                                                      |                                         |                                        |                                         |                                          |
| MolProbity score<br>Clashscore<br>Poor rotamers (%)                    | 1.65<br>4.54<br>1.85                    | 1.66<br>5.19<br>1.37                   | 1.50<br>2.10<br>2.08                    | 1.59<br>3.15<br>1.76                     |
| Ramachandran plot<br>Favored (%)<br>Allowed (%)<br>Disallowed (%)      | 96.60<br>3.18<br>0.22                   | 95.91<br>3.79<br>0.30                  | 96.02<br>3.71<br>0.26                   | 95.71<br>3.88<br>0.41                    |

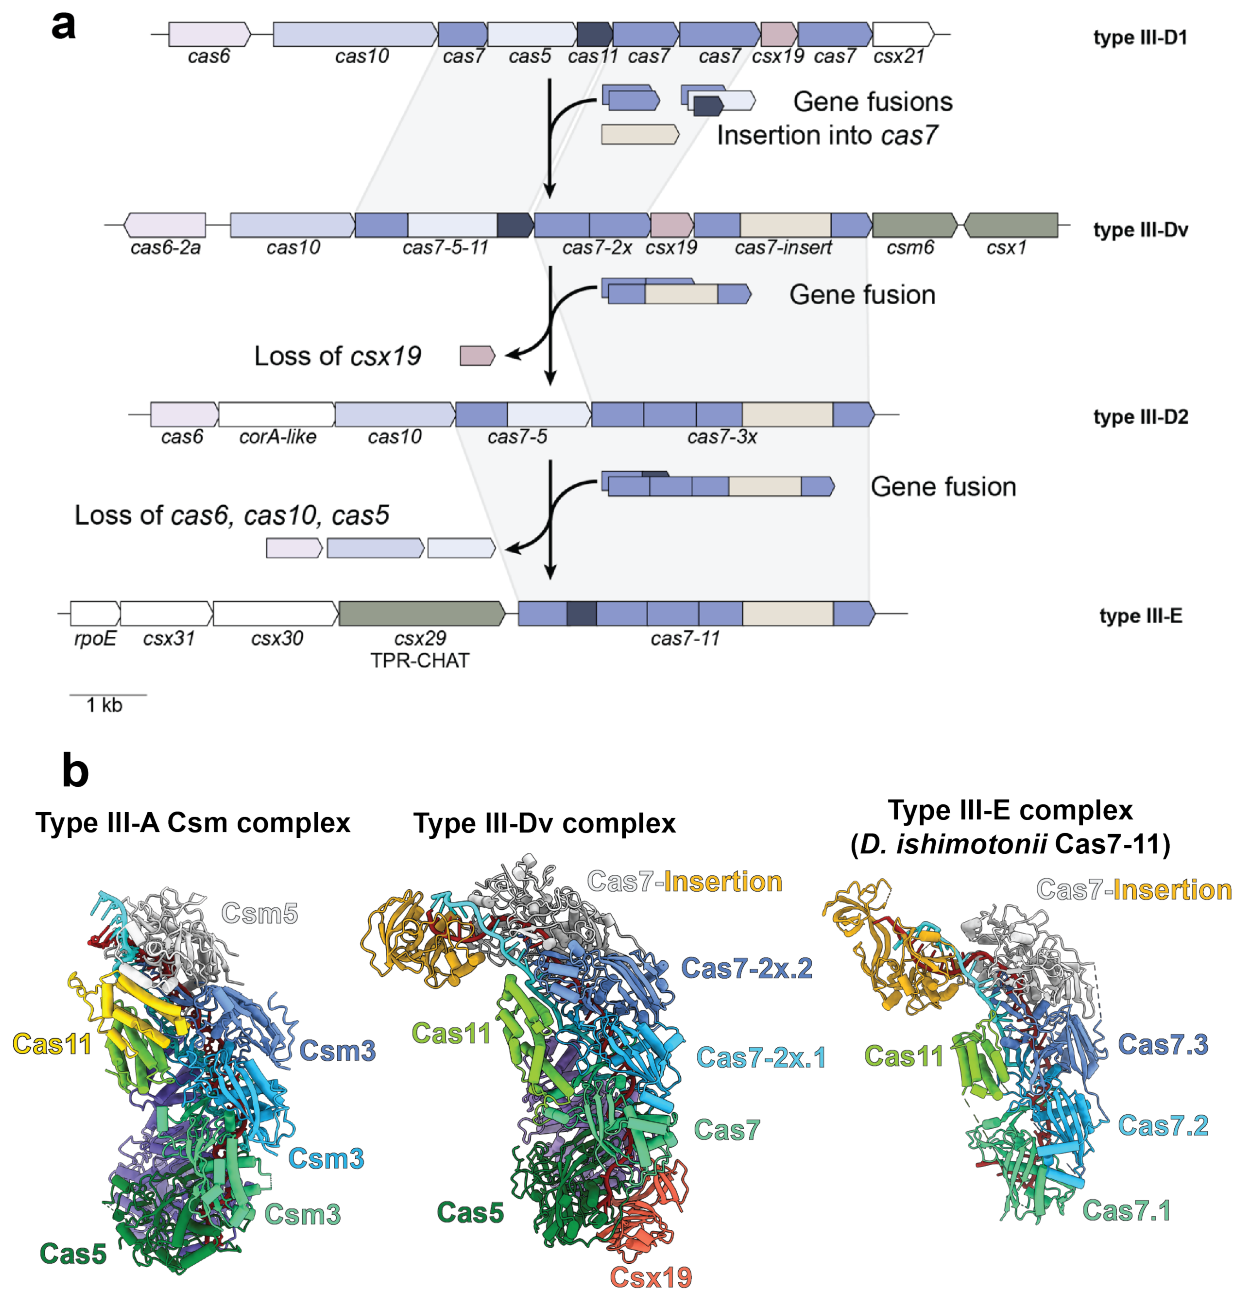

**Extended Data Fig. 1 | Proposed evolution of type III CRISPR-Cas systems. a,** Putative evolutionary progression from type III-D1 to type III-E, with other multi-subunit type III systems presumably preceding type III-D1. **b,** Structural comparison between the multi-subunit type III-A (Csm) complex (PDB: 6IFY), the multi-subunit type III-Dv complex containing many subunit fusions, and the single-subunit type III-E complex (PDB: 7WAH).



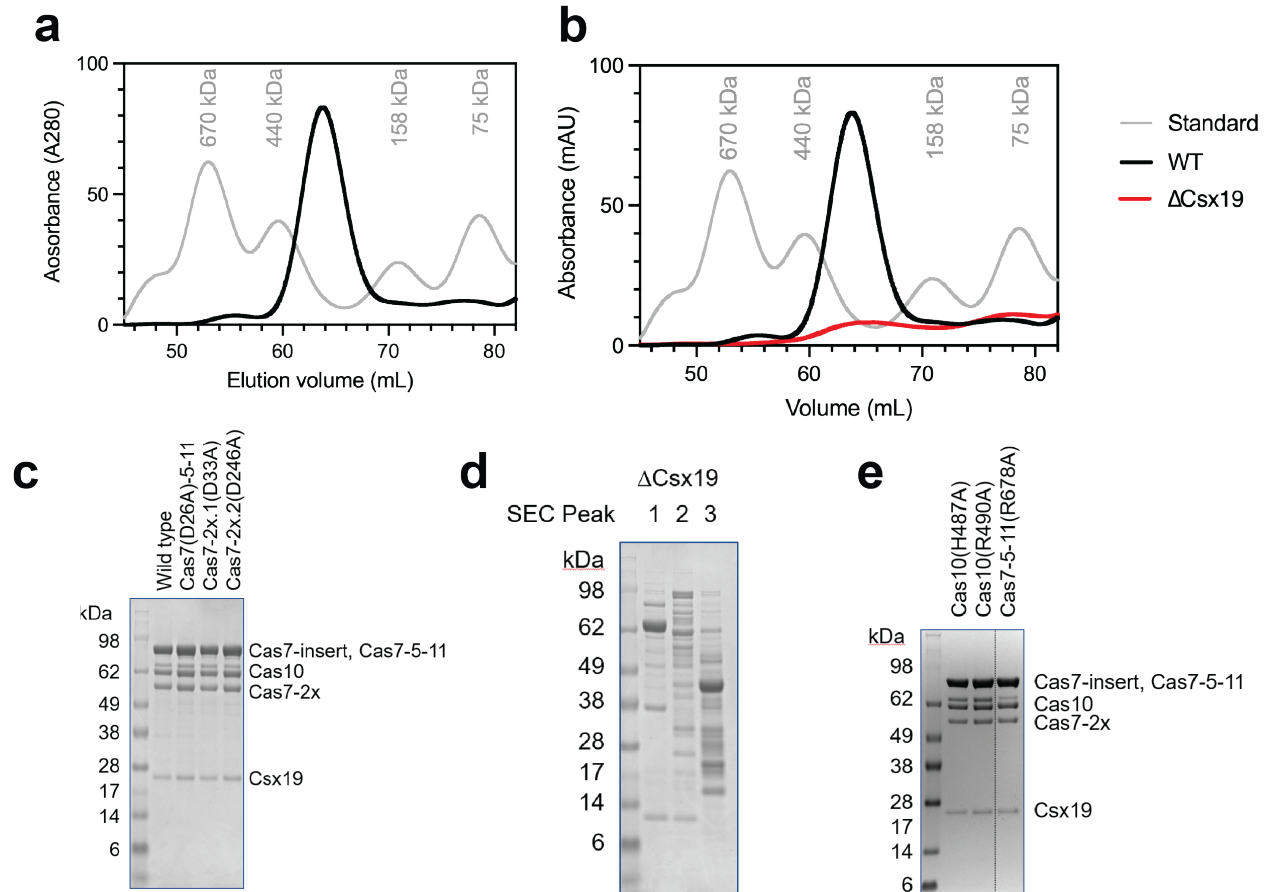

**Extended Data Fig. 2 | Purification of the type III-Dv effector complex.** **a**, Size-exclusion chromatograph of the WT type III-Dv complex. Black peak corresponds to ~330 kDa. Grey peaks represent standardized molecular weights. **b**, Size-exclusion chromatograph of the ΔCsx19 type III-Dv complex purification (red trace). Black peak corresponds to wild-type III-Dv complex. Grey peaks represent standardized molecular weights. **c**, Purification of Cas7 active site aspartate mutants for RNA cleavage analysis. **d**, SDS-PAGE of the ΔCsx19 from the two broad peaks seen in **b**. No complex appeared to form. **e**, Purification of other Cas7 active site residues predicted to be involved in RNA cleavage acid-base catalysis.

## a Binary

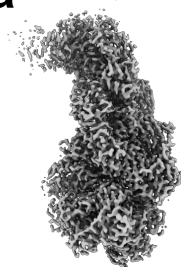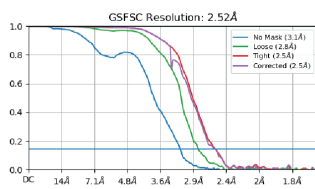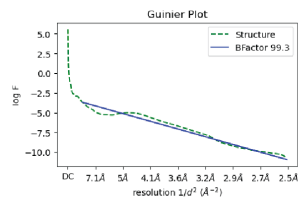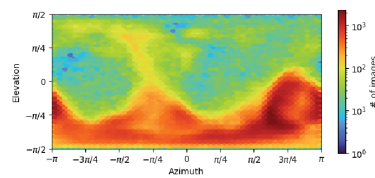

## Binary Local Refinement

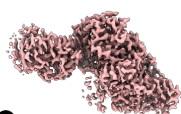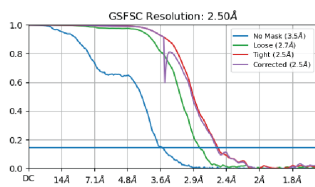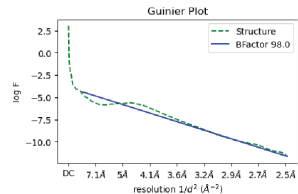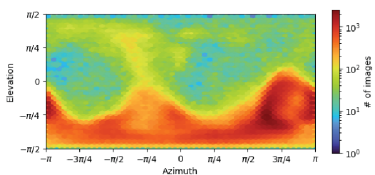

## b Non-self target-bound

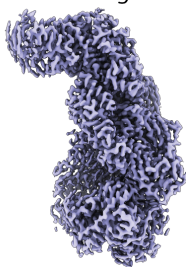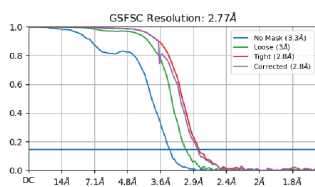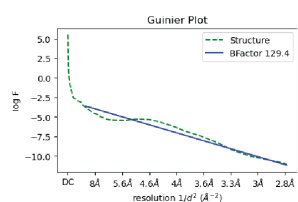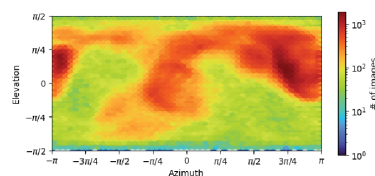

## Non-self Local Refinement

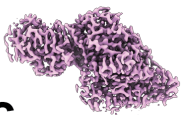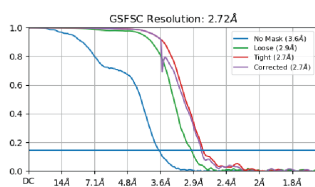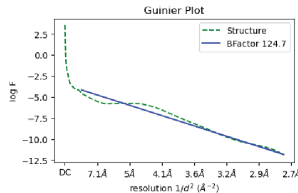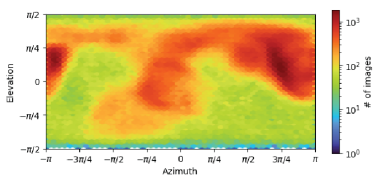

## c Self target, Mg<sup>2+</sup>-bound

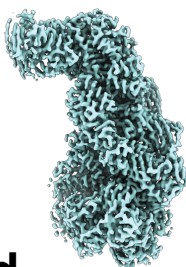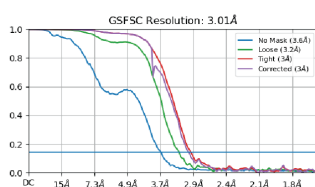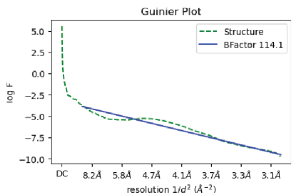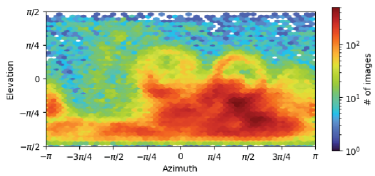

## d Post-cleavage

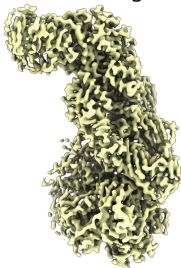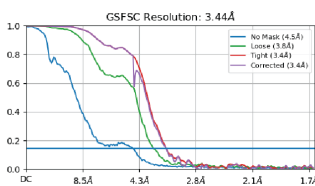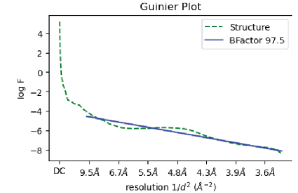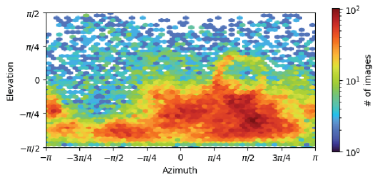

**Extended Data Fig. 3 | EM validation of type III-Dv maps.** Final reconstructions, FSC plots for resolution determination, Guinier plot for b-factor sharpening, and directional distribution plots of the type III-Dv **a**, binary consensus (top) and local refinement (bottom) structures **b**, non-self target-bound consensus and local refinement structures **c**, Self target and Mg<sup>2+</sup>-bound structure and **d**, Self target-bound post-cleavage structure.

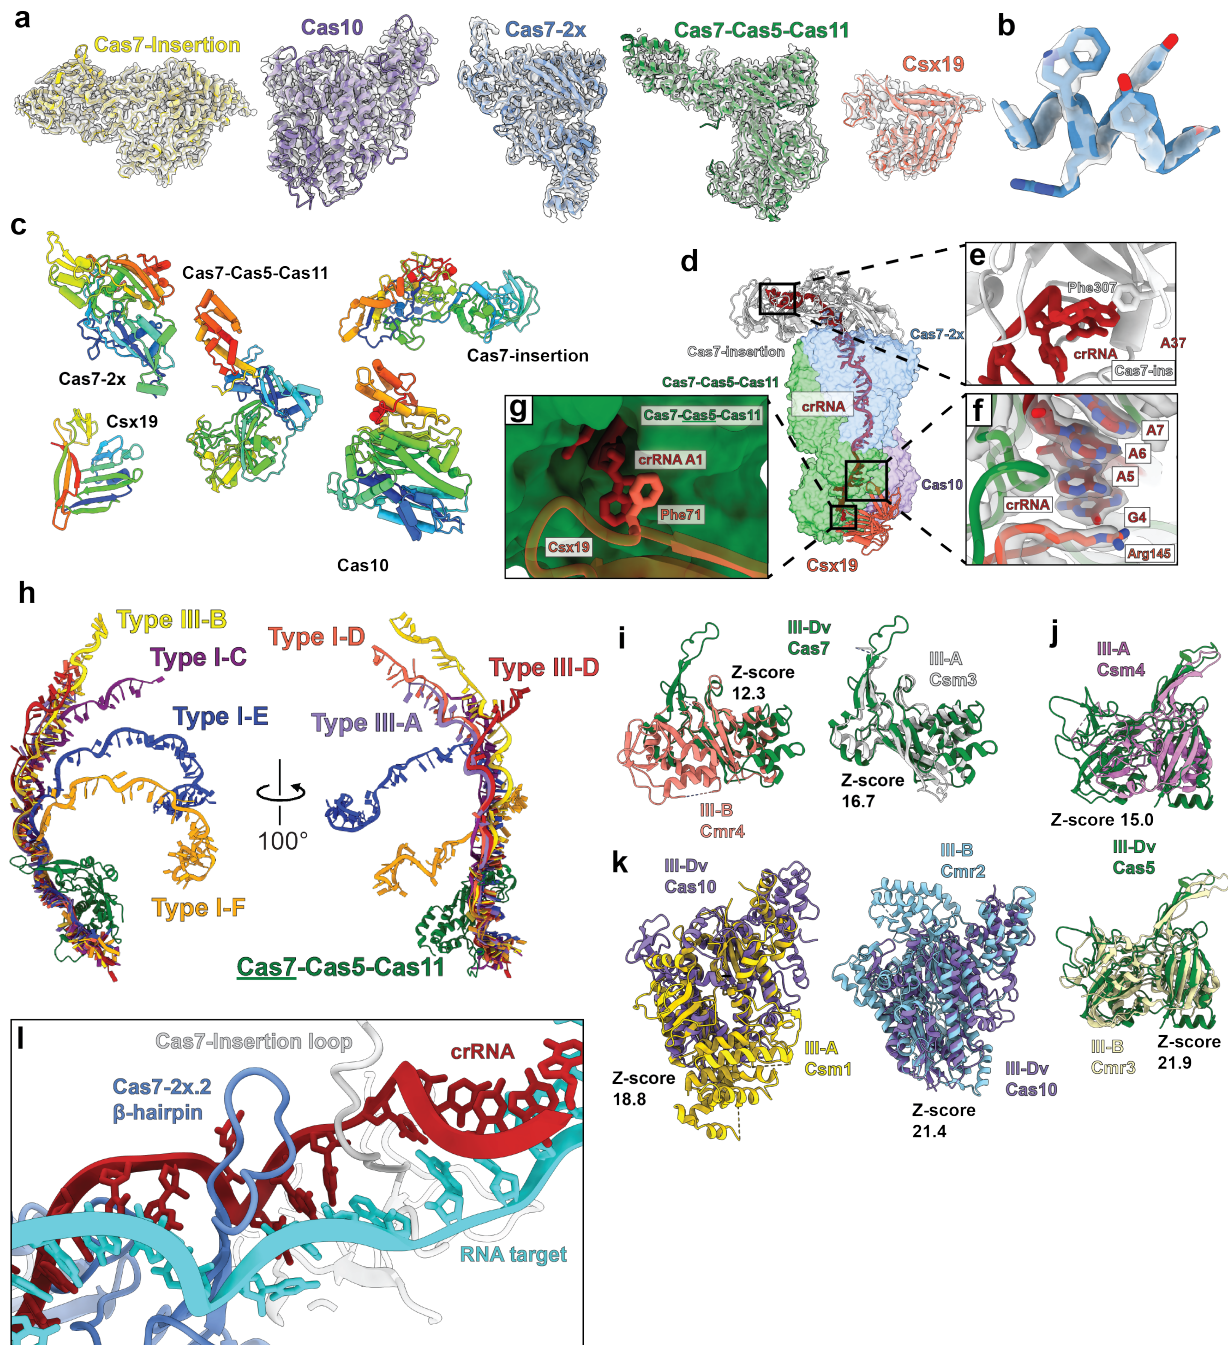

**Extended Data Fig. 4 | Analysis of type III-Dv subunits, crRNA, and RNA target.** **a**, Individual subunits fit into their respective cryo-EM density. **b**, Density of an alpha-helix in the Cas7-insertion subunit. **c**, Connectivity of the type III-Dv subunit structures. The subunits are colored N-terminus (blue) to C-terminus (red). **d**, crRNA trajectory through the type III-Dv effector complex. **e**, 3' crRNA capping by Phe307 of Cas7-insertion. **f**, 5' crRNA capping by Phe71 of Csx19. **g**, Arg145 of Csx19 interacting with G4 of the crRNA, upstream of the 5' crRNA handle. **h**, crRNA geometry comparison between type III-Dv and other type I and type III systems. **i**, Structural alignments between the III-Dv Cas7 domain of Cas7-Cas5-Cas11 with Cmr4 (Cas7) of the type III-B (peach, Z-score 12.3) and Csm3 of the type III-A complex (white, Z-score 16.7); **j**, III-Dv Cas5 domain of Cas7-Cas5-Cas11 with Cas5 (Csm4) of the type III-A complex (magenta, Z-score 15.0) and Cas5 (Csm3) of the type III-B complex (green, Z-score 21.9); **k**, III-Dv Cas10 domain of Cas7-Cas5-Cas11 with Cmr2 (Cas10) of the type III-B complex (blue, Z-score 21.4) and Csm1 (Cas10) of the type III-A complex (yellow, Z-score 18.8). **l**, Cas7-Insertion loop, Cas7-2x.2  $\beta$ -hairpin, crRNA, and RNA target.

(Cmr3) of the type III-B complex (beige, Z-score 21.9); **k**, III-Dv Cas10 subunit with Cas10 (Csm1) of the type III-A complex (yellow) and Cas10 (Cmr2) of the type III-B complex (cyan). **I**, Comparison between the protrusion of the Cas7-2x.2 beta-hairpin and Cas7-insertion loop between the crRNA and the RNA target duplex.



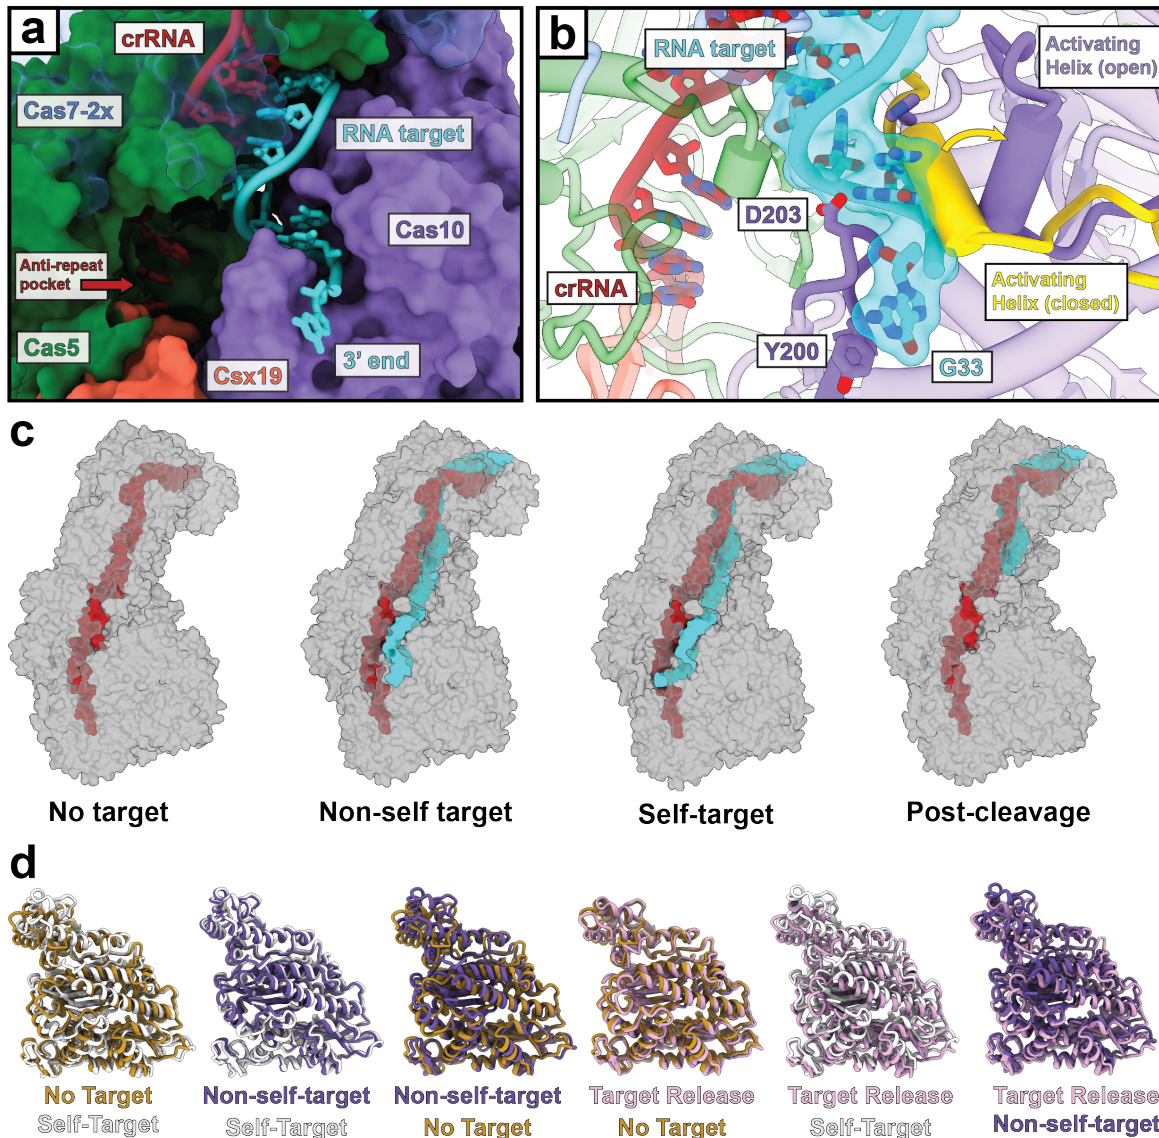

**Extended Data Fig. 5 | Cas10 activation by non-self RNA binding.** **a**, Path of the RNA target strand gets directed through Cas10 rather than into the anti-repeat pocket. **b**, Upon binding a non-self RNA target, an activating helix in Cas10 gets pushed by the target RNA into an active conformation. Yellow arrow indicates directionality of movement of this alpha helix. **c**, Structures of the type III-Dv complex before target binding, after non-self- and self-target binding, and in a post-cleavage state. **d**, Conformational changes within Cas10 between the different structures described in **c**.

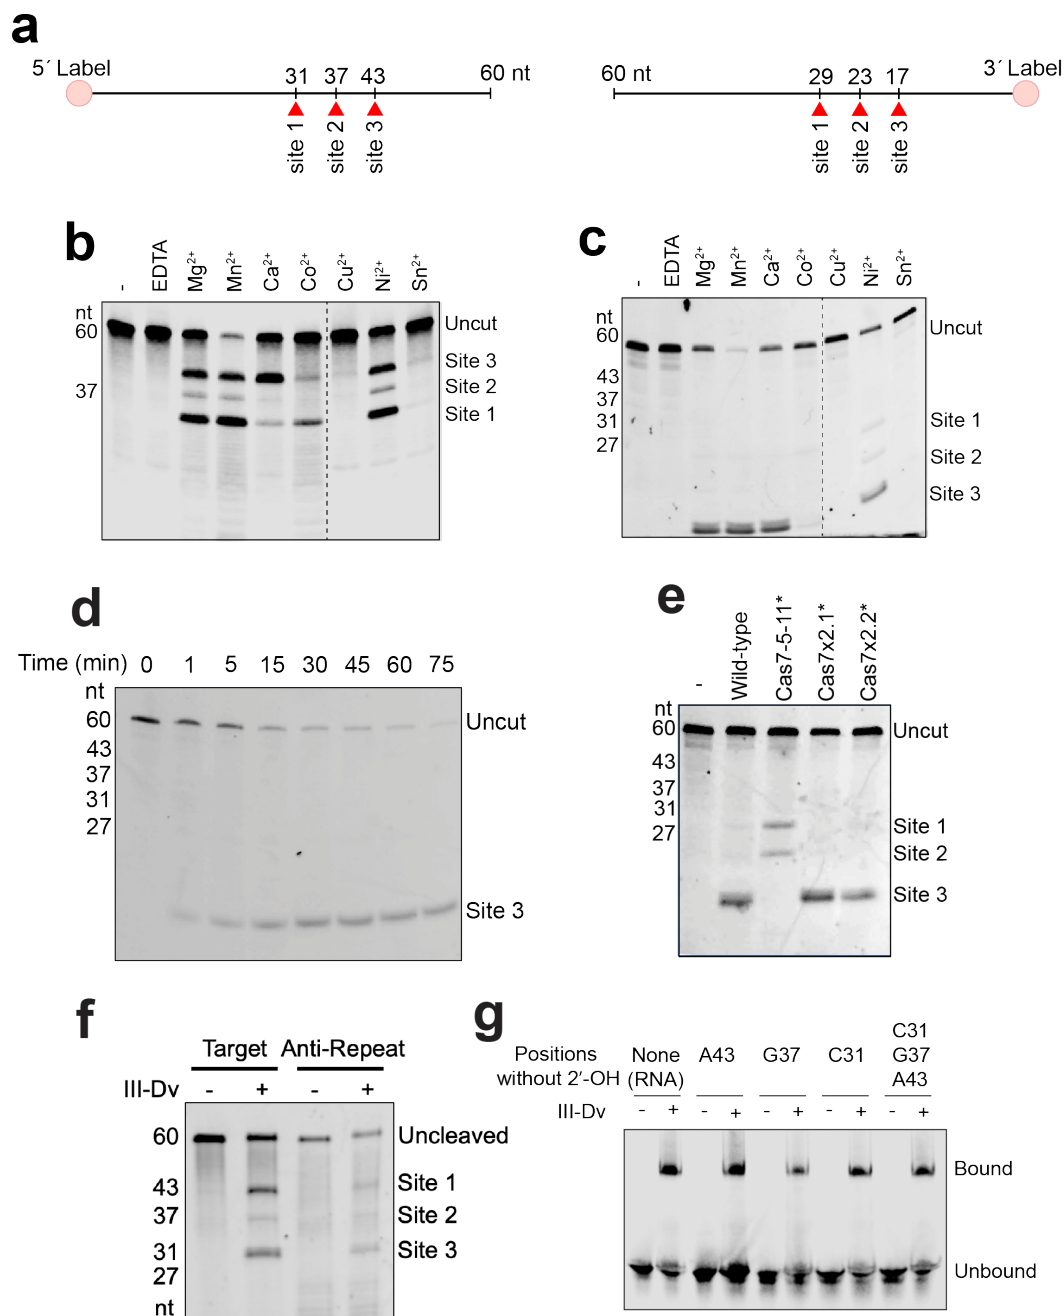

**Extended Data Fig. 6 | Electrophoretic Mobility Shift Assays of RNA target cleavage and binding type III-Dv. a**, Fluorescent probes used in RNA cleavage reactions. **b**, Metal dependent cleavage of the 5'-labelled RNA target. Cleavage site 1, 2, and 3 correspond to 31, 37, and 43 nucleotide products, respectively. **c**, Metal dependent cleavage of the 3'-labeled RNA target. Cleavage site 1, 2, and 3 correspond to 29, 23, and 17 nucleotide products, respectively. **d**, RNA cleavage time course with a 3'-labeled RNA target across 75 minutes. **e**, 3'-labeled RNA cleavage analysis after mutagenesis of the three active site residues of Cas7-Cas5-Cas11, Cas7-2x.1, and Cas7-2x.2. **f**, Comparison of RNA cleavage of Non-Self RNA target (left) and Self RNA target (right). **g**, Binding of a DNA-RNA hybrid target by the type III-Dv complex with 2'-OH groups removed at specified positions.

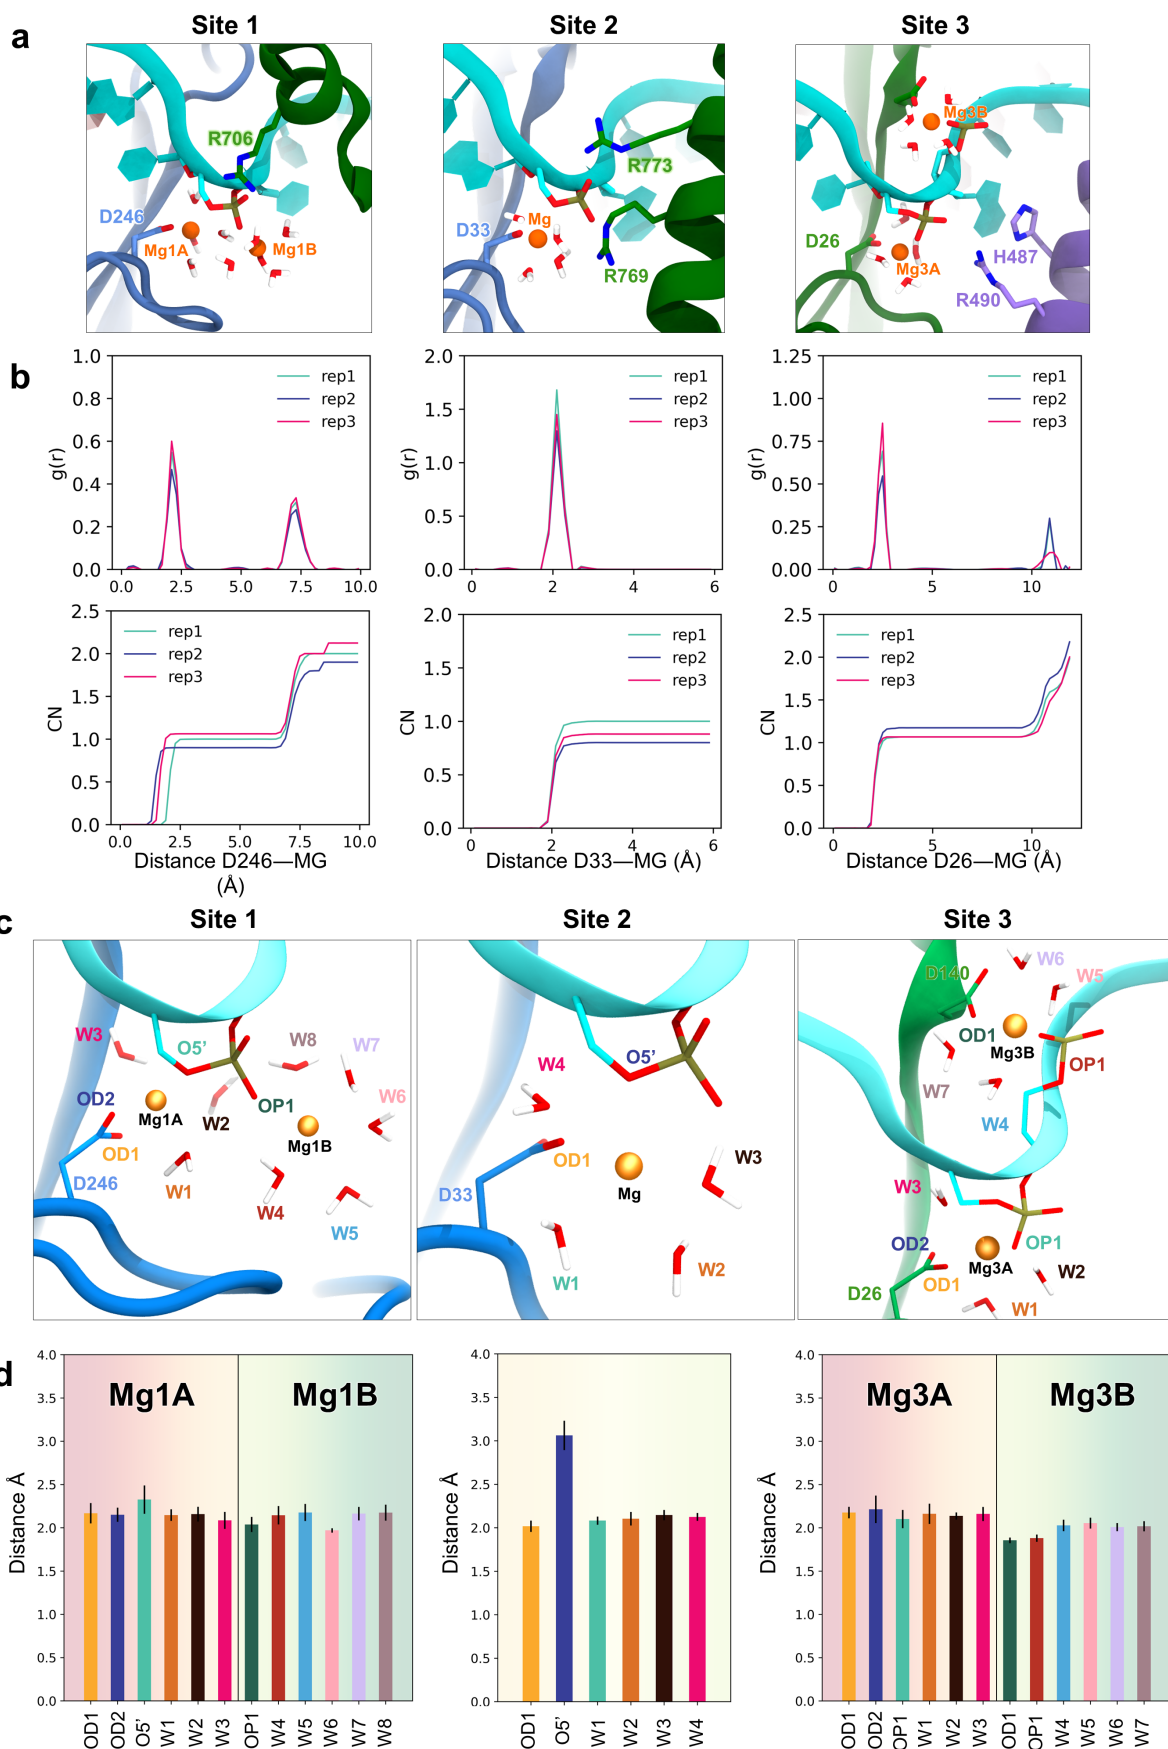



**Extended Data Fig. 7 | Analysis of the three active sites of the type III-Dv complex.** **a**, Representative snapshot showing the placement of  $\text{Mg}^{2+}$  ion at each active site of type III-Dv CRISPR-Cas effector complex during  $\mu\text{s}$ -long MD simulation. **b**, Radial distribution function  $g(r)$  and coordination number calculated obtained from the all-atom MD simulation shows sites 1 and 3 can accommodate two  $\text{Mg}^{2+}$  ions while site 2 takes in only one  $\text{Mg}^{2+}$  ion. These results were consistent in all three replicas. **c**, The coordination of the metal ions attained during  $\sim 40$  ps of ab-initio QM(Car-Parrinello)/MM MD is shown for the three active sites. **d**, Distances between the  $\text{Mg}^{2+}$  ion and key atoms involved in its coordination is shown for each catalytic site, distance is the average of stable last  $\sim 20$  ps of QM/MM simulation and error bars represent standard deviation.

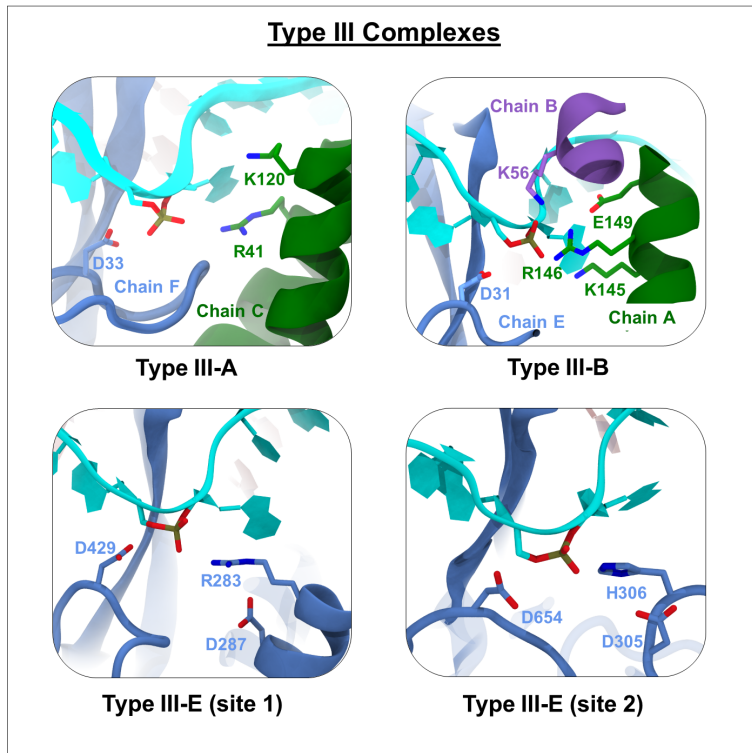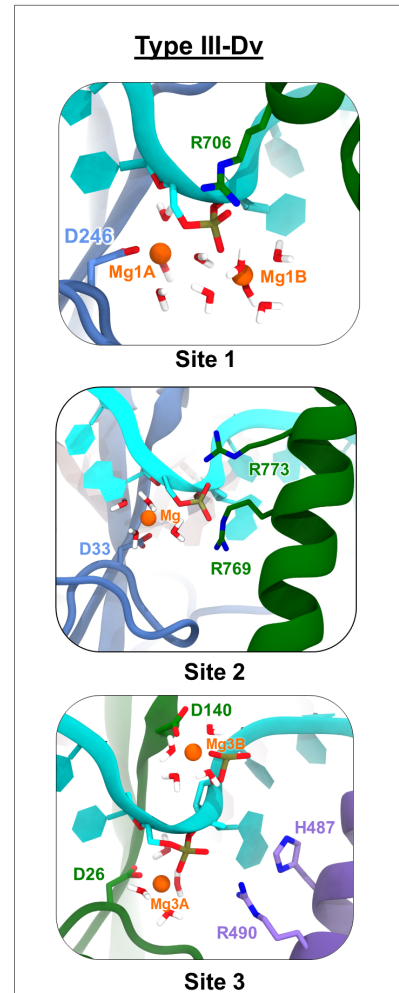

**Ex. Data fig. 8 | Active site comparisons between the type III-Dv complex and other type III complexes.** *Left*, Cas7 active sites from type III-A, -B and -E complexes. *Right*, Cas7 active sites from type III-Dv complex. The structural arrangement of active site 2 from the type III-Dv complex is similar to active sites from other type III complexes.
